# Supplementary material for: Evidence for high-elevation salar recharge and interbasin groundwater flow in the Western Cordillera of the Peruvian Andes
Source: Copernicus journal article supplement (doi:10.5194/hess-26-483-2022), 2022-01-31
Supplement: Supplementary file 1 [file hess-26-483-2022-supplement.zip]

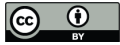

*Supplement of*

**Evidence for high-elevation salar recharge and interbasin groundwater flow in the Western Cordillera of the Peruvian Andes**

**Odiney Alvarez-Campos et al.**

*Correspondence to:* Lisa R. Welp (lwelp@purdue.edu) and Marty D. Frisbee (mdfrisbee@purdue.edu)

- hess-26-483-2022-supplement-title-page.pdf
- Alvarez\_HESS\_SI\_Table\_submit.csv
- Alvarez\_HESS\_SI\_figs.pdf

The copyright of individual parts of the supplement might differ from the article licence.
