# Supplementary material for: Evidence for high-elevation salar recharge and interbasin groundwater flow in the Western Cordillera of the Peruvian Andes
Source: Copernicus journal article supplement (doi:10.5194/hess-26-483-2022), 2022-01-31
Supplement: Supplementary file 2 [file hess-26-483-2022-supplement.zip]

### Overview:

These figures show monthly mean temperature and month total precipitation calculated from 1988 to 2017. This data is available at the AQP-Clima website:

[https://mygeohub.org/groups/nexus\\_swm/arequipa\\_climate](https://mygeohub.org/groups/nexus_swm/arequipa_climate). Data sets used in AQP-Clima were created using weather station data from the Servicio Nacional de Meteorología e Hidrología del Perú (SENAMHI) and the National Ocean and Atmospheric Administration's (NOAA) Global Summary of the Day (GSOD).

The locations plotted correspond to SENAMHI stations near Characato at La Pampilla (-16 24' 49.66", -71 32' 4.31", 2326 masl, Código 116017), at Chiguata (-16 24' 23.2", -71 24' 32.9", 2902 masl, código 116020), and at Las Salinas (-16 19' 14.3", -71 9' 7.62", 4349 masl, Código 116046).

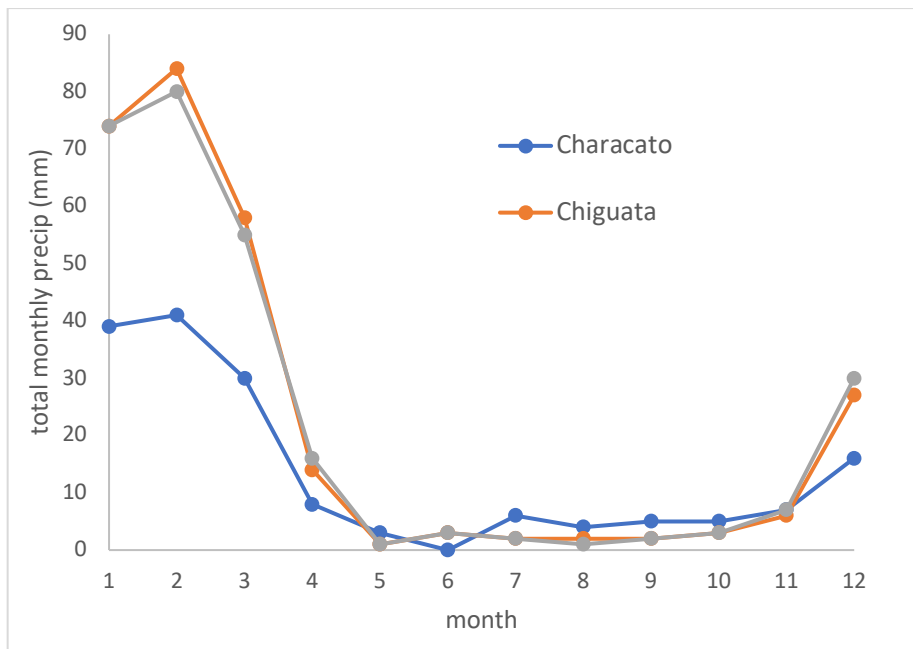

Figure S1: Mean monthly total precipitation in mm.

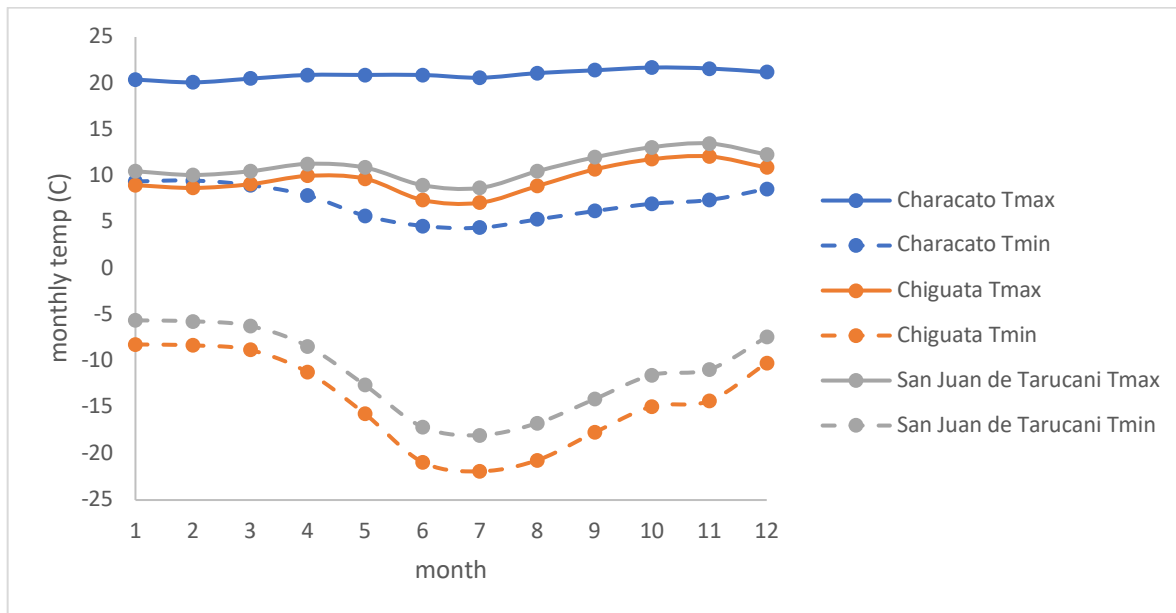

Figure S2: Monthly mean maximum temperature (solid) and minimum temperature (dashed) in °C.
