# Supplementary material for: Evidence for high-elevation salar recharge and interbasin groundwater flow in the Western Cordillera of the Peruvian Andes
Source: Copernicus journal article supplement (doi:10.5194/hess-26-483-2022), 2022-01-31
Supplement: Supplementary file 3 [file hess-26-483-2022-supplement.zip]

Archive with 3 entries (3 files):
- hess-26-483-2022-supplement-title-page.pdf
- Alvarez_HESS_SI_Table_submit.csv
- Alvarez_HESS_SI_figs.pdf
