# Supplementary material for: Evidence for high-elevation salar recharge and interbasin groundwater flow in the Western Cordillera of the Peruvian Andes
Source: Copernicus journal article supplement (doi:10.5194/hess-26-483-2022), 2022-01-31
Supplement: Supplementary file 3 [file hess-26-483-2022-supplement.zip › Alvarez_HESS_SI_Table_submit.csv]

% Supplemental Table 1
% Evidence for high-elevation salar recharge and interbasin groundwater flow in the Western Cordillera of the Peruvian Andes
% Odiney Alvarez-Campos1, Elizabeth J. Olson1, Lisa R. Welp1, Marty D. Frisbee1, Sebastián A. Zuñiga2, José Díaz Rodríguez2, Wendy R. Roque Quispe3, Carol I. Salazar Mamani3, Midhuar R. Arenas Carrión3, Juan Manuel Jara3, Alexander Ccanccapa-Cartagena4,5, and Chad T. Jafvert4,6
% submitted to HESS, May 2021
% revised Oct, 2021
%
% NOTES
% units are included in column headings
% not all field collections included specific conductivity and TDS readings due to lack of equipment
% ND = non-detect
% mass ratios Cl/B and Cl/Br are unitless and calculated as (mg/L)/(mg/L)
% Electrical conductivity (EC) was measured in the field using a YSI Professional Plus (Quatro) multi-parameter probe.
% Field total dissolved solids (TDS; mg L−1) was calculated by the meter (TDS = EC × 0.65).
% Field specific conductivity (SpC, S cm-1) from: SpC = EC * 1.91; where 1.91 is the temperature coefficient at 25°C.
% TSA1 was suspected to have sample storage issues. Data was not used in this analysis, expect for B, Li, and Br concentrations were used to approximate TSA2 sample which was not run for metals.
% PRP precipitation stable isotopes values are reported as amount weighted means of daily sampling. The stdev reported is a stdev of the product of the amounts and delta values divided by the total rain amount.
% The detection limit in mg/L for each solute/analyte is shown in brackets underneath the solute/analyte concentration in mg/L.
% The analytical uncertainty is reported in parentheses underneath the detection limit in brackets. The uncertainty is reported as (100 - percent of standard recovered in measurement). For example, if a 50 mg/L standard is sampled prior to actuallly measuring the sample, and the standard measures 50 mg/L, then the percent recovery is 100% (equivalent to 0% uncertainty). Maximum deviations from th…
%
ID	Date	Group	Sample_Type	Area	Lat	Long	Elevation_m	Field_pH	Field_Temp_C	Field_Specific_Conductivity_uScm	Field_TDS_ppm	Ca_mg/L	Ca_meq/L	Ca_%	Fe_mg/L	Mg_mg/L	Mg_meq/L	Mg_%	K_mg/L	K_meq/L	K_%	Na_mg/L	Na_meq/L	Na_%	%Na+K	Total meq cations	Na/(Na+Ca)	Cl/(Cl+HCO3)	Sr_mg/L	Br_mg/L	Cl_mg/L	Cl_meq/L	Cl_%	Cl/B	Cl/Br	B_ppb	B_ppm	Li_ppb	Li_ppm	F_mg/L	NO3_mg/L	NO2_mg/L	PO4_mg/L	SO4_mg/L	SO4_meq/L	SO4_%	CaCO3_mg/L	HCO3_mg/L	HCO3_meq/L
												[0.05]			[0.02]	[0.05]			[0.05]			[0.05]							[0.005]	[0.1]	[0.1]									[0.1]	[0.1]	[0.1]	[0.5]	[1.0]			[5]	[5]
												(+/-5)			(+/- 8)	(+/- 4)			(+/-7)			(+/- 5)							(+/- 4)	(+/- 6)	(+/- 5)									(+/- 6)	(+/- 4)		(+/- 4)	(+/- 6)
SAN19-1	3/16/19	Characato NaCl spring	Characato Spring	Characato	-16.449667	-71.495534	2431	6.3	19.3	821	617.5	41.7	2.085	26.59	ND	18.6	1.53	19.52	11.9	0.3	3.881	90.2	3.92	50.01	53.89	7.84	0.684	0.565	0.545	0.16	144	4.06	50.22	47.48	900	3033.08	3.03308	274.23	0.27423	0.21	1.77	ND	0.52	106	2.21	27.28	91	111	1.82
SAN19-2	4/13/19	Characato NaCl spring	Characato Spring	Characato	-16.449667	-71.495528	2409	6.6	19			40.9	2.045	26.13	ND	18.5	1.52	19.46	11.6	0.3	3.7913	91.1	3.96	50.62	54.41	7.83	0.69	0.57	0.549	0.18	146	4.12	50.8		811					0.21	0.55	ND	ND	105	2.19	26.95	90	110	1.8
SAN19-3	5/11/19	Characato NaCl spring	Characato Spring	Characato	-16.449667	-71.495528	2409	6.7	18.3			38.4	1.92	26.14	ND	17.1	1.41	19.16	10.7	0.27	3.726	86.1	3.74	50.97	54.7	7.34	0.692	0.565	0.517	0.17	143	4.03	50.94		841					0.2	0.39	ND	ND	100	2.08	26.28	91	110	1.8
SAN19-4	6/15/19	Characato NaCl spring	Characato Spring	Characato	-16.449667	-71.495528	2409	6.6	19.2			39.7	1.985	26.11	ND	18	1.48	19.48	11.3	0.29	3.801	88.5	3.85	50.61	54.41	7.6	0.69	0.579	0.533	1.56	139	3.92	51.74		89					0.17	2.09	ND	ND	96.2	2	26.42	82	101	1.66
SAN19-5	7/14/19	Characato NaCl spring	Characato Spring	Characato	-16.449667	-71.495534	2431	6.7	19			40.6	2.03	25.86	ND	18.3	1.51	19.19	12.3	0.31	4.007	92	4	50.95	54.96	7.85	0.694	0.574	0.636	0.16	144	4.06	51.68		900					0.22	1.77	ND	ND	98.2	2.04	26	88	107	1.75
SAN19-6	8/9/19	Characato NaCl spring	Characato Spring	Characato	-16.449667	-71.495534	2431	6.8	19.2			40.6	2.03	26.27	ND	18.4	1.51	19.6	11.6	0.3	3.8389	89.4	3.89	50.3	54.14	7.73	0.688	0.565	0.535	0.14	140	3.95	50.9		1000					0.25	1.24	ND	ND	98	2.04	26.29	88	108	1.77
SAN19-7	9/7/19	Characato NaCl spring	Characato Spring	Characato	-16.449667	-71.495534	2431	6.6	18.8			40	2	25.68	ND	18.3	1.51	19.34	11.7	0.3	3.8422	91.6	3.98	51.14	54.98	7.79	0.696	0.576	0.544	0.15	144	4.06	52.02		960					0.12	2.13	ND	ND	96.5	2.01	25.72	87	106	1.74
SAN19-8	10/8/19	Characato NaCl spring	Characato Spring	Characato	-16.449667	-71.495534	2431	6.22	18	700	455	40.9	2.045	26.26	ND	18.5	1.52	19.56	11.6	0.3	3.8103	90.2	3.92	50.37	54.18	7.79	0.688	0.575	0.543	0.19	145	4.09	51.68	46.38	763	3126.57	3.13	333.38	0.33338	0.19	3.12	ND	ND	99.5	2.07	26.16	178	107	1.75
SAN19-9	11/11/19	Characato NaCl spring	Characato Spring	Characato	-16.449667	-71.495534	2431	6.7	18.8			41.1	2.055	26.34	ND	18.3	1.51	19.31	11.6	0.3	3.8029	90.7	3.94	50.55	54.35	7.8	0.688	0.577	0.538	0.26	143	4.03	51.7							0.19	3.38	ND	ND	98.4	2.05	26.24	178	105	1.72
SAN19-10	12/13/19	Characato NaCl spring	Characato Spring	Characato	-16.449667	-71.495534	2431	6.6	18.1			40.9	2.045	26.15	ND	18.4	1.51	19.37	11.9	0.3	3.8918	91	3.96	50.59	54.48	7.82	0.69	0.576	0.545	0.27	144	4.06	51.75							0.18	2.75	ND	ND	98.5	2.05	26.11	178	106	1.74
SAN19-11	1/12/20	Characato NaCl spring	Characato Spring	Characato	-16.449667	-71.495534	2431	6.5	18.4			40	2	26.07	ND	18	1.48	19.31	11.7	0.3	3.9003	89.5	3.89	50.72	54.62	7.67	0.691	0.585	0.532	0.27	145	4.09	52.12							0.17	3.27	ND	0.52	99.4	2.07	26.36	174	103	1.69
SAN19-12	2/15/20	Characato NaCl spring	Characato Spring	Characato	-16.449667	-71.495534	2431	6.7	18.9			43	2.15	26.75	ND	19	1.56	19.46	12.1	0.31	3.8508	92.3	4.01	49.94	53.79	8.04	0.682	0.569	0.556	0.3	148	4.17	50.81							0.21	3.26	ND	ND	106	2.21	26.85	186	112	1.84
ANA19-1	3/16/19	Characato sulfate spring	Characato Spring	Characato	-16.48123	-71.4655	2518	7.1	18.8	1211	920	113	5.65	41.31	ND	44.2	3.64	26.6	13.3	0.34	2.4873	93.1	4.05	29.6	32.09	13.68	0.452	0.401	1.02	ND	138	3.89	29.12	73.93		1866.57	1.86657	88.42	0.08842	ND	36.9	ND	ND	293	6.1	45.62	169	206	3.38
ANA19-2	4/13/19	Characato sulfate spring	Characato Spring	Characato	-16.48123	-71.4655	2518	7.3	17			109	5.45	41.16	ND	43.2	3.56	26.85	12.8	0.33	2.4722	89.9	3.91	29.52	31.99	13.24	0.452	0.338	1.05	ND	132	3.72	27.35							ND	0	ND	ND	272	5.66	41.58	212	258	4.23
ANA19-3	5/11/19	Characato sulfate spring	Characato Spring	Characato	-16.4813609	-71.4654992	2509	7.2	20.9			98.9	4.945	39.47	ND	42.2	3.47	27.72	12	0.31	2.4495	87.5	3.8	30.36	32.81	12.53	0.469	0.398	0.961	ND	128	3.61	29.44							ND	33.2	ND	ND	263	5.47	44.63	159	194	3.18
ANA19-4	6/15/19	Characato sulfate spring	Characato Spring	Characato	-16.4813609	-71.4654992	2509	7.3	22.6			101	5.05	39.08	ND	43.7	3.6	27.84	12.6	0.32	2.494	90.9	3.95	30.59	33.08	12.92	0.474	0.394	0.987	0.13	125	3.53	30.11		962					0.16	38	ND	ND	242	5.04	43.01	ND	192	3.15
ANA19-5	7/14/19	Characato sulfate spring	Characato Spring	Characato	-16.4813609	-71.4654992	2509	7.3	17.5			98.2	4.91	39.01	ND	42.4	3.49	27.73	12.4	0.32	2.5197	89	3.87	30.74	33.26	12.59	0.475	0.395	0.971	0.1	124	3.5	30.3		1240					0.18	36.2	ND	ND	237	4.93	42.72	155	190	3.11
ANA19-6	8/9/19	Characato sulfate spring	Characato Spring	Characato	-16.4813609	-71.4654992	2509	7.6	23.2			99.1	4.955	38.92	ND	43.1	3.55	27.86	12.5	0.32	2.5112	89.9	3.91	30.7	33.21	12.73	0.476	0.399	0.974	0.11	127	3.58	30.22		1155					0.15	37.1	ND	ND	247	5.14	43.36	157	191	3.13
ANA19-7	9/7/19	Characato sulfate spring	Characato Spring	Characato	-16.4813609	-71.4654992	2509	7.3	18.2			91.5	4.575	39.24	ND	38.7	3.19	27.32	11.4	0.29	2.5004	83	3.61	30.95	33.45	11.66	0.476	0.399	0.893	0.15	117	3.3	30.66		780					0.19	33.1	ND	ND	220	4.58	42.53	144	176	2.89
ANA19-8	10/8/219	Characato sulfate spring	Characato Spring	Characato	-16.4813609	-71.4654992	2509	6.65	17.4	1010	656.5	101	5.05	39.18	ND	43.1	3.55	27.52	12.6	0.32	2.5002	91.3	3.97	30.8	33.3	12.89	0.475	0.387	0.995	0.22	121	3.41	29.54	74.14	550	1632.13	1.63213	94.45	0.09445	0.2	33.5	ND	ND	240	4.99	43.22	430	192	3.15
ANA19-9	11/11/19	Characato sulfate spring	Characato Spring	Characato	-16.48123	-71.4655	2518	7.4	18.1			105	5.25	39.73	ND	43.8	3.6	27.28	13.4	0.34	2.5933	92.4	4.02	30.4	32.99	13.22	0.468	0.408	1.02	ND	135	3.81	30.08							ND	40.2	ND	ND	271	5.64	44.55	443	196	3.21
ANA19-10	12/13/19	Characato sulfate spring	Characato Spring	Characato	-16.48123	-71.4655	2518	7.2	19.1			104	5.2	39.45	ND	44.1	3.63	27.54	12.7	0.32	2.4643	92.6	4.03	30.55	33.01	13.18	0.471	0.403	1.02	ND	133	3.75	30.07							ND	36.8	ND	ND	264	5.49	44.04	441	197	3.23
ANA19-11	1/12/20	Characato sulfate spring	Characato Spring	Characato	-16.48123	-71.4655	2518	7.2	21.3			103	5.15	39.38	ND	43.3	3.56	27.25	19.9	0.51	3.8913	88.7	3.86	29.49	33.38	13.08	0.463	0.435	0.969	ND	136	3.84	30.99							ND	65.7	ND	3.24	271	5.64	45.56	435	177	2.9
ANA19-12	2/15/20	Characato sulfate spring	Characato Spring	Characato	-16.48123	-71.4655	2518	7.4	22			92.4	4.62	39.75	ND	38.5	3.17	27.26	11.2	0.29	2.4645	81.6	3.55	30.52	32.99	11.62	0.469	0.406	0.898	ND	126	3.55	30.24							ND	29.3	ND	ND	249	5.18	44.09	390	184	3.02
YUM19-1	3/16/19	Characato NaCl spring	Characato Spring	Characato	-16.4487613	-71.4729721	2590	6.4	18.1	677	448.5	36	1.8	31.19	ND	15	1.23	21.39	7.9	0.2	3.5008	58.3	2.53	43.92	47.42	5.77	0.618	0.463	0.41	0.15	84.4	2.38	39.86	40.94	563	2061.8	2.0618	207.62	0.20762	0.15	0	ND	ND	95.4	1.99	33.24	80	98	1.61
YUM19-2	4/13/19	Characato NaCl spring	Characato Spring	Characato	-16.44865	-71.47312	2590	6.5	18.2			38.5	1.925	31.08	ND	16.2	1.33	21.53	8.5	0.22	3.5102	62.5	2.72	43.88	47.39	6.19	0.619	0.461	0.439	0.3	84.6	2.39	40.02		282					0.16	0	ND	ND	93.9	1.95	32.77	81	99	1.62
YUM19-3	5/11/19	Characato NaCl spring	Characato Spring	Characato	-16.4487613	-71.4729721	2590	6.9	17.1			36.6	1.83	30.6	ND	15.5	1.28	21.33	8.22	0.21	3.5149	61.3	2.67	44.56	48.08	5.98	0.626	0.459	0.426	0.24	84.7	2.39	39.84		353					0.14	0.1	ND	0.54	94.6	1.97	32.83	82	100	1.64
YUM19-4	6/15/19	Characato NaCl spring	Characato Spring	Characato	-16.4487613	-71.4729721	2590	6.6	17			35.7	1.785	30.39	ND	15.2	1.25	21.3	8.13	0.21	3.5396	60.5	2.63	44.78	48.32	5.87	0.629	0.475	0.424	0.45	86	2.43	41.02		191					0.17	2.52	ND	ND	92.8	1.93	32.65	78	95	1.56
YUM19-5	7/14/19	Characato NaCl spring	Characato Spring	Characato	-16.4487613	-71.4729721	2590	6.9	18.3			71.8	3.59	16.27	ND	31.4	2.58	11.71	85.9	2.2	9.9558	315	13.7	62.06	72.02	22.07	0.814	0.814	1.44	0.436	459	12.95	58.65		1053					0.54	17.9	ND	ND	356	7.41	33.56	86	105	1.72
YUM19-6	8/9/19	Characato NaCl spring	Characato Spring	Characato	-16.4487613	-71.4729721	2590	6.9	17			36.1	1.805	28.96	ND	15.7	1.29	20.73	9.23	0.24	3.7871	66.7	2.9	46.52	50.31	6.23	0.649	0.479	0.424	0.125	92	2.6	41.34		736					0.13	0.13	ND	ND	98.2	2.04	32.55	82	100	1.64
YUM19-7	9/7/19	Characato NaCl spring	Characato Spring	Characato	-16.4487613	-71.4729721	2590	6.7	16.7			35.3	1.765	30.53	ND	14.9	1.23	21.21	7.93	0.2	3.5082	59.5	2.59	44.75	48.26	5.78	0.628	0.462	0.418	0.157	84.9	2.39	40.36		541					0.15	0	ND	ND	92.1	1.92	32.3	81	99	1.62
YUM19-8	10/8/19	Characato NaCl spring	Characato Spring	Characato	-16.4487613	-71.4729721	2590	6.22	16.5	525	441.25	34.6	1.73	31.15	ND	14.6	1.2	21.63	7.69	0.2	3.5409	55.8	2.43	43.68	47.22	5.55	0.617	0.465	0.379	0.13	87.9	2.48	40.68	47.5	676	1850.61	1.85061	203.97	0.20397	0.15	0	ND	ND	94.2	1.96	32.16	146	101	1.66
YUM19-9	11/11/19	Characato NaCl spring	Characato Spring	Characato	-16.4487613	-71.4729721	2590	6.8	17.9			37.1	1.855	31.21	ND	15.2	1.25	21.05	8.11	0.21	3.4896	60.5	2.63	44.25	47.74	5.94	0.62	0.463	0.429	0.16	86.1	2.43	40.39							0.17	ND	ND	ND	93.5	1.95	32.36	155	100	1.64
YUM19-10	12/13/19	Characato NaCl spring	Characato Spring	Characato	-16.4487613	-71.4729721	2590	6.8	16.6			37	1.85	30.82	ND	15.3	1.26	20.98	8.24	0.21	3.5108	61.7	2.68	44.69	48.2	6	0.625	0.467	0.43	0.11	87.5	2.47	40.66							0.14	0.16	ND	ND	94.3	1.96	32.33	155	100	1.64
YUM19-11	1/12/20	Characato NaCl spring	Characato Spring	Characato	-16.4487613	-71.4729721	2590	6.6	19.3			36.4	1.82	31.29	ND	14.9	1.23	21.08	8.01	0.2	3.5221	59	2.57	44.1	47.63	5.82	0.618	0.468	0.413	0.15	86.1	2.43	40.4							0.16	0.87	ND	0.54	95	1.98	32.88	152	98	1.61
YUM19-12	2/15/20	Characato NaCl spring	Characato Spring	Characato	-16.4487613	-71.4729721	2590	6.9	18.2			36.8	1.84	31.1	ND	15.2	1.25	21.15	8.13	0.21	3.5145	60.2	2.62	44.24	47.75	5.92	0.621	0.467	0.423	ND	85.7	2.42	40.34							0.17	ND	ND	ND	94.6	1.97	32.85	154	98	1.61
OJO19-1	3/16/19	Characato sulfate spring	Characato Spring	Characato	-16.468674	-71.4575	2595	6.4	18.4	541	403	40.4	2.02	38.44	ND	17.5	1.44	27.41	6.27	0.16	3.0513	37.6	1.63	31.11	34.16	5.26	0.482	0.328	0.349	ND	52.3	1.48	26.53	68.92		758.84	0.75884	70.97	0.07097	0.18	1.56	ND	ND	112	2.33	41.92	87	107	1.75
OJO19-2	4/13/19	Characato sulfate spring	Characato Spring	Characato	-16.46861	-71.45749	2595	6.8	19.3			42	2.1	38.17	ND	18.3	1.51	27.37	6.47	0.17	3.0075	39.8	1.73	31.45	34.46	5.5	0.487	0.324	0.37	ND	52.3	1.48	26.58							0.18	0.47	ND	ND	110	2.29	41.24	89	109	1.79
OJO19-3	5/11/19	Characato sulfate spring	Characato Spring	Characato	-16.468674	-71.4575	2595	6.9	18.5			42	2.1	35.53	ND	18.4	1.51	25.63	7.81	0.2	3.3799	48.2	2.1	35.46	38.84	5.91	0.534	0.371	0.378	0.22	62.5	1.76	30.02		284					0.21	2.72	ND	ND	114	2.37	40.4	87	106	1.74
OJO19-4	6/15/19	Characato sulfate spring	Characato Spring	Characato	-16.468674	-71.4575	2595	6.8	20.5			40.9	2.045	38.35	ND	17.6	1.45	27.17	6.28	0.16	3.012	38.6	1.68	31.47	34.48	5.33	0.486	0.328	0.361	0.12	52.2	1.47	27.1		435					0.17	0	ND	ND	106	2.21	40.61	88	107	1.75
OJO19-5	7/14/19	Characato sulfate spring	Characato Spring	Characato	-16.468674	-71.4575	2595	7	19.2			41.7	2.085	38.02	ND	18.1	1.49	27.17	6.65	0.17	3.1014	40	1.74	31.71	34.81	5.48	0.49	0.33	0.396	0.065	53.7	1.51	27.3		826					0.15	1.01	ND	ND	108	2.25	40.5	89	109	1.79
OJO19-6	8/9/19	Characato sulfate spring	Characato Spring	Characato	-16.468674	-71.4575	2595	7	19			41.4	2.07	37.7	ND	18	1.48	26.98	6.62	0.17	3.0838	40.7	1.77	32.23	35.31	5.49	0.496	0.339	0.369	0.094	55.9	1.58	28.1		595					0.15	0.18	ND	ND	108	2.25	40.06	89	109	1.79
OJO19-7	9/7/19	Characato sulfate spring	Characato Spring	Characato	-16.468674	-71.4575	2595	6.9	18.5			41.4	2.07	37.48	ND	18	1.48	26.83	6.68	0.17	3.0937	41.4	1.8	32.59	35.69	5.52	0.5	0.347	0.372	0.055	56.9	1.61	28.73		1035					0.17	1.74	ND	ND	107	2.23	39.86	88	107	1.75
OJO19-8	10/8/19	Characato sulfate spring	Characato Spring	Characato	-16.468674	-71.4575	2595	6.44	18.2	469	304.85	41.2	2.06	38.65	ND	17.6	1.45	27.18	6.26	0.16	3.0041	38.2	1.66	31.16	34.17	5.33	0.481	0.326	0.358	0.11	53.1	1.5	26.69	49.07	483	1082.02	1.08202	112.19	0.11219	0.2	0.68	0.39	ND	111	2.31	41.17	175	110	1.8
OJO19-9	11/11/19	Characato sulfate spring	Characato Spring	Characato	-16.468674	-71.4575	2595	7.1	18.4			43.6	2.18	38.56	ND	18.5	1.52	26.93	6.75	0.17	3.0536	40.9	1.78	31.45	34.51	5.65	0.484	0.332	0.386	0.14	53.7	1.51	27.17					91.58		0.18	2.44	ND	0.5	110	2.29	41.07	185	108	1.77
OJO19-10	12/13/19	Characato sulfate spring	Characato Spring	Characato	-16.468674	-71.4575	2595	6.8	18.6			42.1	2.105	38.29	ND	17.9	1.47	26.8	6.52	0.17	3.0334	40.3	1.75	31.87	34.91	5.5	0.489	0.336	0.373	0.11	54.7	1.54	27.54							0.18	1.95	ND	ND	110	2.29	40.86	179	108	1.77
OJO19-11	1/12/20	Characato sulfate spring	Characato Spring	Characato	-16.468674	-71.4575	2595	6.9	19.3			41.6	2.08	38.51	ND	17.7	1.46	26.97	6.45	0.16	3.0539	39.1	1.7	31.47	34.53	5.4	0.485	0.335	0.363	0.13	53.4	1.51	27.22							0.19	2.25	ND	ND	110	2.29	41.37	177	106	1.74
OJO19-12	2/15/20	Characato sulfate spring	Characato Spring	Characato	-16.468674	-71.4575	2595	6.9	20.5			41.7	2.085	38.45	ND	17.8	1.47	27.02	6.39	0.16	3.0141	39.3	1.71	31.51	34.53	5.42	0.485	0.328	0.364	ND	52.8	1.49	26.84							0.19	ND	ND	ND	110	2.29	41.25	177	108	1.77
SOC19-1	3/16/19	Characato NaCl surface water	Characato Surface water	Characato	-16.458086	-71.5655761	2206	8.3	19.8	1193	825	73.2	3.66	31.05	ND	32	2.63	22.34	15.9	0.41	3.4499	117	5.09	43.16	46.61	11.79	0.615	0.499	0.704	ND	167	4.71	39.39	61.33		2722.86	2.72286	125.5	0.1255	ND	9.94	ND	ND	216	4.5	37.59	137	168	2.75
SOC19-2	6/15/19	Characato NaCl surface water	Characato Surface water	Characato	-16.458086	-71.5655761	2206	8.6	21			66	3.3	26.04	ND	31.7	2.61	20.59	18	0.46	3.6324	145	6.3	49.74	53.38	12.67	0.687	0.551	0.78	1.04	220	6.21	48.47		212					0.74	4.13	ND	ND	176	3.66	28.61	147	179	2.93
SOC19-3	9/7/19	Characato NaCl surface water	Characato Surface water	Characato	-16.458086	-71.5655761	2206					73.3	3.665	26.81	ND	34.4	2.83	20.71	18.8	0.48	3.5166	154	6.7	48.97	52.49	13.67	0.678	0.568	0.822	0.362	235	6.63	48.37		649					0.55	3.84	ND	ND	199	4.14	30.22	147	179	2.93
SOC20-3	2/15/20	Characato NaCl surface water	Characato Surface water	Characato	-16.458086	-71.5655761	2206	8	19.8			33.2	1.66	22.62	ND	16.2	1.33	18.17	14.8	0.38	5.159	91.2	3.97	54.04	59.2	7.34	0.733	0.586	0.341	0.15	119	3.36	70.91							0.32	ND	ND	ND	130			149	84	1.38
AND19-1	3/16/19	Characato NaCl surface water	Characato Surface water	Characato	-16.446	-71.4997	2419	8	25	750	626.6	31.7	1.585	23.68	ND	14.5	1.19	17.83	13	0.33	4.9672	82.4	3.58	53.52	58.49	6.69	0.722	0.587	0.325	0.15	111	3.13	44.4	54.54	740	2035.35	2.03535	125.65	0.12565	0.27	0	ND	ND	127	2.64	37.47	64	78	1.28
AND19-2	4/13/19	Characato NaCl surface water	Characato Surface water	Characato	-16.44641	-71.49986	2400	8.7	25			57.2	2.86	24.51	ND	28	2.3	19.75	18.1	0.46	3.9664	139	6.04	51.78	55.75	11.67	0.708	0.56	0.679	0.79	214	6.04	50.15		271					ND	1.07	ND	ND	156	3.25	26.97	138	168	2.75
AND19-3	9/7/19	Characato NaCl surface water	Characato Surface water	Characato	-16.446	-71.4997	2419	8.9	23.8			51.8	2.59	17.55	ND	28.3	2.33	15.78	27.8	0.71	4.8168	210	9.13	61.86	66.67	14.76	0.802	0.675	0.579	0.202	264	7.45	51.35		1307					0.52	5.29	ND	ND	239	4.97	34.3	104	127	2.08
MOL19-2	4/13/19	Characato sulfate surface water	Characato Surface water	Characato	-16.488528	-71.502361	2383	7.5	20.6			39.4	1.97	44.59	ND	16.8	1.38	31.29	8.52	0.22	4.9317	19.5	0.85	19.19	24.12	4.42	0.331	0.097	0.342	ND	19.5	0.55	12.46							0.18	ND	ND	ND	42.3	0.88	19.94	149	182	2.98
MOL19-1	3/16/19	Characato sulfate surface water	Characato Surface water	Characato	-16.489341	-71.5020278	2401	8	26	881	183.3	18.3	0.915	39.92	ND	7.77	0.64	27.9	5.56	0.14	6.2032	13.7	0.6	25.98	32.19	2.29	0.428	0.25	0.173	ND	15.3	0.43	17.94	82.17		186.19	0.18619	4.62	0.00462	0.14	1.46	ND	ND	58.6	1.22	50.7	38	46	0.75
MOY19-1	6/15/19	Characato sulfate surface water	Characato Surface water	Characato	-16.4815	-71.4656	2516	7.5	19.9			96.4	4.82	41.81	ND	36.4	3	25.99	10.3	0.26	2.2853	79.3	3.45	29.91	32.2	11.53	0.451	0.47	1	0.14	142	4.01	36.77		1014					0.16	23.4	ND	ND	205	4.27	39.16	131	160	2.62
MOY19-2	9/7/19	Characato sulfate surface water	Characato Surface water	Characato	-16.4815	-71.4656	2516	7.3	19.9			99.1	4.955	41.42	ND	38.2	3.14	26.28	10.6	0.27	2.2664	82.6	3.59	30.02	32.29	11.96	0.455	0.454	1.02	0.19	142	4.01	35.7		747					0.18	26.2	ND	ND	212	4.41	39.32	140	171	2.8
MOY19-3	12/13/19	Characato sulfate surface water	Characato Surface water	Characato	-16.4815	-71.4656	2516	7.3	23.4			71.6	3.58		ND	33.7	2.77		20.3	0.52		162					0.693	0.576	0.832	ND	246	6.94	49.62							0.51	2.16	ND	ND	196	4.08	29.17	317	181	2.97
MOY20-4	2/15/20	Characato sulfate surface water	Characato Surface water	Characato	-16.4815	-71.4656	2516	7.8	21.9			40.2	2.01		ND	17.5	1.44		7.33	0.19		29.4					0.422	0.359	0.36	0.1	39.8	1.12	22.68							0.21	2.68	ND	ND	128	2.66	53.81	172	71	1.16
RCH19-1	3/16/19	Characato sulfate surface water	Characato Surface water	Characato	-16.471351	-71.4618	2541	7.7	20	606	442	44.9	2.245	38.16	ND	19.5	1.6	27.28	6.72	0.17	2.9216	42.8	1.86	31.63	34.55	5.88	0.488	0.339	0.388	ND	58	1.64	26.96	62.43		929.06	0.92906	87.71	0.08771	0.21	1.03	ND	ND	124	2.58	42.52	93	113	1.85
RCH19-2	4/13/19	Characato sulfate surface water	Characato Surface water	Characato	-16.471333	-71.461778	2541	8	18.8			45.5	2.275	37.92	ND	20.1	1.65	27.58	6.8	0.17	2.8991	43.6	1.9	31.6	34.5	6	0.489	0.327	0.4	ND	55.9	1.58	26.46							0.18	0.39	ND	ND	120	2.5	41.91	94	115	1.89
RCH19-3	6/15/19	Characato sulfate surface water	Characato Surface water	Characato	-16.471333	-71.461778	2541	8.2	22.5			44	2.2	37.89	ND	19.2	1.58	27.22	6.95	0.18	3.0616	42.5	1.85	31.83	34.89	5.81	0.491	0.338	0.393	0.054	56.1	1.58	27.28		1039					0.19	2.19	ND	ND	116	2.41	41.62	90	110	1.8
RCH19-4	9/7/19	Characato sulfate surface water	Characato Surface water	Characato	-16.471333	-71.461778	2541	8.8	18.6			43.9	2.195	38.14	ND	19	1.56	27.18	6.63	0.17	2.9467	42	1.83	31.73	34.68	5.75	0.489	0.333	0.388	0.065	56.3	1.59	27.13		866					0.17	1.01	ND	ND	116	2.41	41.23	92	113	1.85
RCH19-5	12/13/19	Characato sulfate surface water	Characato Surface water	Characato	-16.471333	-71.461778	2541	7.9	19.1			44.1	2.205	38.43	ND	19	1.56	27.25	6.61	0.17	2.9463	41.4	1.8	31.37	34.32	5.74	0.484	0.335	0.382	0.1	55.5	1.57	26.98							0.21	1.78	ND	ND	117	2.43	41.95	188	110	1.8
RCH20-6	2/15/20	Characato sulfate surface water	Characato Surface water	Characato	-16.471333	-71.461778	2541	8	19.8			45.8	2.29	38.55	ND	19.3	1.59	26.74	7.01	0.18	3.0181	43.3	1.88	31.69	34.71	5.94	0.486	0.354	0.391	0.14	60.4	1.7	28.28							0.19	2.75	0.33	ND	121	2.52	41.79	194	110	1.8
BED19-1	4/22/19	Chiguata springs	Chiguata Spring	Characato	-16.404245	-71.404381	2899	6.4	19.9			39.6	1.98	19.28	ND	20.1	1.65	16.11	26.6	0.68	6.6235	137	5.96	57.99	64.62	10.27	0.776	0.645	0.693	0.76	187	5.28	49.84	53.45	246	3498.35	3.49835	61.03	0.06103	ND	4.05	ND	ND	174	3.62	34.21	84	103	1.69
BED19-2	5/11/19	Chiguata springs	Chiguata Spring	Characato	-16.404245	-71.404381	2899	6.4	13.8			36.1	1.805	20.26	ND	18.6	1.53	17.18	19.1	0.49	5.4817	117	5.09	57.08	62.57	8.91	0.764	0.62	0.386	0.63	155	4.37	47.97		246					ND	3.98	ND	ND	153	3.18	34.94	78	95	1.56
BED19-3	6/15/19	Chiguata springs	Chiguata Spring	Characato	-16.404245	-71.404381	2899	6.2	18			37.5	1.875	20.87	ND	19.2	1.58	17.59	18.9	0.48	5.3815	116	5.04	56.15	61.53	8.98	0.756	0.609	0.405	0.033	154	4.34	48.46		4667					0.24	5.72	ND	ND	144	3	33.43	81	99	1.62
BED19-4	7/14/19	Chiguata springs	Chiguata Spring	Characato	-16.404245	-71.404381	2899	6.7	15.4			37.1	1.855	20.68	ND	18.9	1.56	17.35	18.4	0.47	5.2474	117	5.09	56.72	61.97	8.97	0.759	0.612	0.408	0.026	153	4.32	48.48		5885					0.22	5.43	ND	ND	144	3	33.66	80	97	1.59
BED19-6	9/7/19	Chiguata springs	Chiguata Spring	Characato	-16.404245	-71.404381	2899	6.4	14.5			36.7	1.835	20.12	ND	19.1	1.57	17.24	19.4	0.5	5.4401	120	5.22	57.2	62.64	9.12	0.766	0.628	0.403	0.015	155	4.37	49.14		10333					0.22	5.47	ND	ND	145	3.02	33.91	76	92	1.51
BED19-8	10/8/19	Chiguata springs	Chiguata Spring	Characato	-16.404245	-71.404381	2899	6.3	14.6	306	525.5	43.1	2.155	22.26	ND	20.8	1.71	17.68	20	0.51	5.2827	122	5.3	54.78	60.06	9.68	0.739	0.625	0.477	ND	150	4.23	48.97	69.08		2171.49	2.17149	105.47	0.10547	0.21	33.7	ND	ND	141	2.93	33.96	193	90	1.48
BED19-9	11/11/19	Chiguata springs	Chiguata Spring	Characato	-16.404245	-71.404381	2899	6.5	16.4			35.7	1.785	20.1	ND	18.6	1.53	17.24	18.7	0.48	5.3852	117	5.09	57.28	62.66	8.88	0.766	0.625	0.386	0.17	155	4.37	48.82							0.21	6.24	ND	0.55	147	3.06	34.16	166	93	1.52
BED19-10	12/13/19	Chiguata springs	Chiguata Spring	Characato	-16.404245	-71.404381	2899	6.3	15.3			35.8	1.79	20.61	ND	18.2	1.5	17.25	18.9	0.48	5.5661	113	4.91	56.57	62.14	8.68	0.759	0.628	0.374	0.13	155	4.37	48.91							0.22	6.32	ND	0.52	147	3.06	34.22	165	92	1.51
BED20-11	1/12/20	Chiguata springs	Chiguata Spring	Characato	-16.404245	-71.404381	2899	6.3	15			36.8	1.84	20.37	ND	19	1.56	17.31	19.5	0.5	5.5211	118	5.13	56.8	62.32	9.03	0.762	0.631	0.389	0.16	157	4.43	48.78							0.24	6.42	ND	ND	151	3.14	34.61	170	92	1.51
BED20-12	2/15/20	Chiguata springs	Chiguata Spring	Characato	-16.404245	-71.404381	2899	6.6	15.6			36.3	1.815	20.21	ND	18.7	1.54	17.14	19.4	0.5	5.5248	118	5.13	57.13	62.65	8.98	0.765	0.625	0.384	0.19	155	4.37	48.71							0.22	4.58	ND	ND	148	3.08	34.31	168	93	1.52
BAD19-1	3/16/19	Chiguata springs	Chiguata Spring	Characato	-16.40459	-71.401749	2900	6.7	17.7	1338	1046.5	43.4	2.17	15.77	ND	22.8	1.88	13.64	32.9	0.84	6.1162	204	8.87	64.47	70.59	13.76	0.825	0.73	0.423	ND	251	7.08	50.37							ND	20.4	ND	ND	262	5.45	38.79	76	93	1.52
BAD19-2	4/22/19	Chiguata springs	Chiguata Spring	Characato	-16.40459	-71.401749	2900	7	19.6			42.3	2.115	15.98	ND	22.8	1.88	14.18	31.7	0.81	6.1248	194	8.43	63.72	69.85	13.24	0.821	0.735	0.422	ND	241	6.8	50.63	71.36		3377.35	3.38	72.89	0.07289	ND	21.3	ND	ND	250	5.2	38.75	71	87	1.43
BAD19-3	5/11/19	Chiguata springs	Chiguata Spring	Characato	-16.40459	-71.401749	2900	6.8	12.8			44.3	2.215	15.84	ND	24	1.98	14.13	32.6	0.83	5.9637	206	8.96	64.06	70.03	13.98	0.823	0.746	0.434	ND	256	7.22	50.99							ND	20.9	ND	ND	265	5.52	38.94	72	87	1.43
BAD19-4	6/15/19	Chiguata springs	Chiguata Spring	Characato	-16.40459	-71.401749	2900	7.1	19.3			45.6	2.28	16	ND	24.8	2.04	14.32	33	0.84	5.9219	209	9.09	63.76	69.68	14.25	0.821	0.741	0.457	0.114	255	7.19	51.3		2237					ND	17.6	ND	ND	258	5.37	38.29	73	89	1.46
BAD19-5	7/9/19	Chiguata springs	Chiguata Spring	Characato	-16.40459	-71.401749	2900	7	13.8			35.5	1.775	20.1	ND	18.6	1.53	17.34	18.8	0.48	5.4452	116	5.04	57.12	62.56	8.83	0.766	0.623	0.388	0.032	154	4.34	49		4813					0.27	4.6	ND	ND	144	3	33.8	76	93	1.52
BAD19-6	8/9/19	Chiguata springs	Chiguata Spring	Characato	-16.40459	-71.401749	2900	7	13.8			44.8	2.24	15.82	ND	24.6	2.02	14.3	33.4	0.85	6.0316	208	9.04	63.86	69.89	14.16	0.823	0.753	0.448	0.192	262	7.39	52		1365					ND	25.4	ND	ND	260	5.41	38.07	71	86	1.41
BAD19-7	9/7/19	Chiguata springs	Chiguata Spring	Characato	-16.40459	-71.401749	2900	6.6	13.4			44.2	2.21	15.28	ND	24.6	2.02	13.99	32.9	0.84	5.816	216	9.39	64.91	70.73	14.47	0.83	0.76	0.443	0.19	269	7.59	51.82		1416					ND	22.7	ND	ND	272	5.66	38.66	70	85	1.39
BAD19-8	10/8/19	Chiguata springs	Chiguata Spring	Characato	-16.40459	-71.401749	2900	6.42	16.1	1248	812.5	43.7	2.185	15.75	ND	23.6	1.94	14.01	32.4	0.83	5.9748	205	8.91	64.27	70.24	13.87	0.824	0.749	0.444	ND	256	7.22	51.66	64.76		3953.02	3.95	120.07	0.12007	ND	22	ND	ND	257	5.35	38.26	206	86	1.41
BAD19-9	11/11/19	Chiguata springs	Chiguata Spring	Characato	-16.40459	-71.401749	2900					46.8	2.34	16	ND	24.7	2.03	13.9	33.5	0.86	5.8599	216	9.39	64.23	70.09	14.62	0.822	0.746	0.472	ND	265	7.48	51.38							ND	21.9	ND	ND	269	5.6	38.48	219	90	1.48
BAD19-10	12/13/19	Chiguata springs	Chiguata Spring	Characato	-16.40459	-71.401749	2900	6.5	15.8			46.5	2.325	16.01	ND	24.6	2.02	13.94	34	0.87	5.9873	214	9.3	64.06	70.05	14.52	0.821	0.751	0.471	ND	265	7.48	51.87							ND	26.6	ND	ND	264	5.49	38.12	218	88	1.44
BAD20-11	1/12/20	Chiguata springs	Chiguata Spring	Characato	-16.40459	-71.401749	2900	6.8	15.2			50.7	2.535	17.85	ND	25.5	2.1	14.78	32.4	0.83	5.8349	201	8.74	61.54	67.37	14.2	0.799	0.76	0.428	ND	260	7.33	51.15							ND	32.8	ND	ND	272	5.66	39.48	232	82	1.34
BAD20-12	2/15/20	Chiguata springs	Chiguata Spring	Characato	-16.40459	-71.401749	2900	7.1	15.5			46	2.3	15.87	ND	24.5	2.02	13.91	34.1	0.87	6.0176	214	9.3	64.2	70.22	14.49	0.823	0.744	0.444	ND	262	7.39	51.32							ND	24.7	ND	ND	266	5.54	38.44	216	90	1.48
ATA19-1	3/16/19	Chiguata surface water	Chiguata Surface water	Characato	-16.408185	-71.423399	2783	8	16.2	565	448.5	21.4	1.07	18.96	0.036	10.8	0.89	15.75	14	0.36	6.3451	76.5	3.33	58.94	65.29	5.64	0.781	0.61	0.212	ND	90.6	2.56	43.63	61.57		1471.39	1.47139	93.91	0.09391	0.29	0.2	ND	ND	113	2.35	40.14	48	58	0.95
ATA19-2	4/13/19	Chiguata surface water	Chiguata Surface water	Characato	-16.408185	-71.423399	2783	8.4	21.5			45.6	2.28	18.62	0.028	23.9	1.97	16.06	25.5	0.65	5.3251	169	7.35	60	65.32	12.25	0.788	0.648	0.612	ND	228	6.43	49.79							ND	4.56	ND	ND	214	4.45	34.48	101	124	2.03
ATA19-3	6/15/19	Chiguata surface water	Chiguata Surface water	Characato	-16.408185	-71.423399	2783	7.6	16.4			52.5	2.625	17.93	ND	28.5	2.35	16.02	27.8	0.71	4.8571	206	8.96	61.19	66.04	14.64	0.797	0.668	0.588	0.263	267	7.53	51.36		1015					0.59	4.65	ND	ND	238	4.95	33.77	109	133	2.18
ATA19-4	12/13/19	Chiguata surface water	Chiguata Surface water	Characato	-16.408185	-71.423399	2783	7.3	15.1			54.5	2.725	18.4	ND	29	2.39	16.12	27.2	0.7	4.698	207	9	60.78	65.48	14.81	0.792	0.667	0.605	ND	272	7.67	51.29							ND	2.63	ND	ND	243	5.06	33.81	255	136	2.23
ATA20-5	2/15/20	Chiguata surface water	Chiguata Surface water	Characato	-16.408185	-71.423399	2783	8.1	14.4			21.9	1.095	19.02	0.117	11.3	0.93	16.16	14.5	0.37	6.4419	77.3	3.36	58.38	64.82	5.76	0.779	0.607	0.215	ND	89.7	2.53	43.38							0.31	1.07	ND	ND	113	2.35	40.32	101	58	0.95
PPI19-1	5/10/19	Pichu Pichu snow	High Elevation Snow	Characato	-16.453705	-71.238463	5106					5.55	0.2775	89.62	ND	0.02	0.002	0.53	0.36	0.01	2.9733	0.49	0.02	6.88	9.85	0.31	0.081	0.074	0.002	ND	0.635	0.02	4.03	18.17		34.94	0.03494	0.16	0.00016	ND	0.25	ND	ND	14.2	0.3	66.47	7	8	0.13
LSA19-1	4/22/19	Laguna Salinas surface water	Laguna Salinas Surface water	Laguna Salinas	-16.320443	-71.150692	4332	8.7	15			682	34.1	11.86	ND	303	24.94	8.68	1330	34.02	11.8355	4470	194.35	67.62	79.46	287.4	0.868	0.966	17.7	7.28	6350	179.13	64.51	39.62	872	160266	160		0	ND	0	ND	ND	4560	94.9	34.18	357	221	3.62
LSA19-2	10/9/19	Laguna Salinas surface water	Laguna Salinas Surface water	Laguna Salinas	-16.340469	-71.131288	4317	7.81	10.3	1366438	88660	1090	54.5	3.22	ND	2130	175.31	10.35	8290	212.02	12.5159	28800	1252.17	73.92	86.43	1694	0.964	0.981	68.8	ND	43200	1218.62	72.08	60.32		716198	716	4980	4.9795	ND	0	ND	ND	22000	457.86	27.08	11500	858	14.07
MAX19-1	10/9/19	Laguna Salinas surface water	Laguna Salinas Surface water	Laguna Salinas	-16.36243698	-71.13606499	4322	7.48	21.4	203796	13256600	844	42.2	1.41	ND	4310	354.73	11.85	16000	409.21	13.6717	50300	2186.96	73.07	86.74	2993.1	0.983	0.99	93.7	48.9	80200	2262.34	80.02	72.59	1640	1104804	1105	390231	390.2306381	ND	0	ND	ND	26500	551.51	19.51	19900	806	13.21
TSA19-1	4/22/19	Laguna Salinas springs	Laguna Salinas Spring	Laguna Salinas	-16.340469	-71.131288	4317	9.5	16			10.2	0.51	31.15	ND	4.26	0.35	21.41	6.23	0.16	9.7313	14.2	0.62	37.71	47.44	1.64	0.582	0.389	0.096	ND	18.5	0.52	32.06	20.79		890	0.89	10.4	0.0104	0.16	5.34	ND	ND	30.3	0.63	38.74	24	29	0.48
TSA19-2	10/9/19	Laguna Salinas springs	Laguna Salinas Spring	Laguna Salinas	-16.320443	-71.150692	4332	6.73	13.6	130	84.5	6.19	0.31	28.8	ND	2.55	0.21	19.53	4.54	0.12	10.8	10.1	0.44	40.86	51.67	1.07	0.62	0.187	0.063	ND	6.46	0.182	15.52							0.17	0.52	ND	0.57	25.6	0.53	45.38	25.9	28	0.46
HUM19-1	10/9/19	Laguna Salinas springs	Laguna Salinas Spring	Laguna Salinas	-16.40286701	-71.11821304	4330	8.6	12.8	1231	741	48.4	2.42	40.02	ND	11.7	0.96	15.92	12.2	0.31	5.1598	54.1	2.35	38.9	44.06	6.05	0.528	0.366	0.427	ND	39.9	1.13	18	2.17		18380	18.38	45.35	0.04535	0.27	0	ND	ND	192	4	63.91	169	69	1.13
INK19-1	10/9/19	Laguna Salinas springs	Laguna Salinas Spring	Laguna Salinas	-16.34234598	-71.13423698	4324	7.8	9.6	897	578.5	1.79	0.0895	1.27	ND	1.21	0.1	1.42	19.1	0.49	6.9532	146	6.35	90.36	97.31	7.03	0.988	0.639	0.02	ND	154	4.34	60.74	72.3		2130	2.13	188.38	0.18838	1.22	0	ND	4.94	66.4	1.38	19.32	9.43	87	1.43
MOQ19-1	10/9/19	Laguna Salinas springs	Laguna Salinas Spring	Laguna Salinas	-16.42857104	-71.07418399	4346	8.46	21.4	86.8	57.2	18	0.9	1.96	ND	67.2	5.53	12.03	248	6.34	13.7912	764	33.22	72.23	86.02	45.99	0.977	0.933	1.44	0.75	1400	39.49	78.09	3685.57	1867	380	0.38	23.97	0.02397	ND	0	ND	ND	453	9.43	18.64	322	101	1.66
PAT19-1	10/9/19	Laguna Salinas springs	Laguna Salinas Spring	Laguna Salinas	-16.42407599	-71.00721502	4429	7.66	7.9	117.9	76.7	6.69	0.3345	38.39	ND	2.54	0.21	23.99	4.67	0.12	13.7087	4.79	0.21	23.9	37.61	0.87	0.417	0.128	0.128	ND	3.97	0.11	11.25	3.69		1075	1.07	36.36	0.03636	0.14	0	ND	ND	21.2	0.44	44.31	27.2	27	0.44
UBI19-1	10/9/19	Laguna Salinas springs	Laguna Salinas Spring	Laguna Salinas	-16.42688602	-71.05673698	4347	7.58	16	88.1	57.2	31.2	1.56	2.04	ND	106	8.72	11.38	470	12.02	15.6817	1250	54.35	70.9	86.58	76.65	0.976	0.948	2.86	1.67	2150	60.65	78.04	137.4	1287	15648	15.65	714.61	0.71461	ND	0	ND	ND	728	15.15	19.49	516	117	1.92
MNE19-1	5/10/19	Pichu Pichu springs	Pichu Pichu Spring	Laguna Salinas	-16.38226	-71.254875	4657	8.5	9.5			10.1	0.505	28.97	0.419	5.49	0.45	25.92	5.59	0.14	8.2009	14.8	0.64	36.91	45.11	1.74	0.594	0.078	0.034	ND	4.88	0.14	8.28	30.47		160	0.16	1.26	0.00126	0.96	0	ND	ND	27.6	0.57	34.54	47	58	0.95
MCU19-1	5/10/19	Pichu Pichu springs	Pichu Pichu Spring	Laguna Salinas	-16.457708	-71.232635	4888	7	9.2			8.86	0.443	45.05	ND	2.98	0.25	24.94	2.17	0.06	5.6439	5.51	0.24	24.36	30.01	0.98	0.383	0.055	0.025	ND	1.16	0.03	3.14	19.56		59	0.06	0.82	0.00082	0.2	0	ND	ND	32.8	0.68	65.43	16	20	0.33
MSI19--1	5/10/19	QueÒuales forest springs	QueÒuales Spring	Laguna Salinas	-16.390751	-71.318264	4052	9.6	17.1			3.53	0.1765	33.92	0.081	1.03	0.08	16.29	3.06	0.08	15.0385	4.16	0.18	34.76	49.79	0.52	0.541	0.036	0.053	ND	1.01	0.03	4.97	11.07		91	0.09	0.85	0.00085	0.1	0	ND	ND	4.91	0.1	17.82	22	27	0.44
PUQ19-1	10/9/19	QueÒuales forest springs	QueÒuales Spring	Laguna Salinas	-16.56054603	-71.21410998	3770	7.35	14.8	126.4	81.9	7.58	0.379	24.92	ND	3.42	0.28	18.51	5.42	0.14	9.1146	16.6	0.72	47.46	56.57	1.52	0.687	0.265	0.111	ND	18	0.51	30.81	114.81		157	0.16	1.38	0.00138	ND	0	0.16	ND	15.4	0.32	19.45	33	50	0.82
QUE19-1	10/9/19	QueÒuales forest springs	QueÒuales Spring	Laguna Salinas	-16.39080897	-71.31842997	4011	8.5	8.6	94.1	61.1	4.71	0.2355	37.99	0.28	1.14	0.09	15.14	3.25	0.08	13.41	4.77	0.21	33.46	46.87	0.62	0.503	0.04	0.093	ND	1.43	0.04	5.7			0	0	0	0	ND	0	ND	ND	5.28	0.11	15.53	16.5	34	0.56
RPU19-1	10/9/19	QueÒuales forest surface water	QueÒuales Surface water	Laguna Salinas	-16.56054603	-71.21410998	3767	7.5	13	130.7	84.5	7.07	0.3535	28.43	ND	3.11	0.26	20.59	3.36	0.09	6.9121	12.6	0.55	44.06	50.98	1.24	0.641	0.133	0.132	ND	7.54	0.21	16.45			0	0	5.47	0.00547	ND	0	ND	ND	13.3	0.28	21.41	30.4	49	0.8
MID20-01	19-Feb	Rain collected in the city of Arequipa	precipitation	Arequipa	-16.4068	-71.5241	2355
PRP-Characato-19	2019 wet season	weighted average of 2019 daily rain collections	precipitation	Characato	-16.475	-71.4916	2783
PRP-Characato-20	2020 wet season	weighted average of 2020 daily rain collections	precipitation	Characato	-16.475	-71.4916	2783
PRP-Chiguata-20	2020 wet season	weighted average of 2020 daily rain collections	precipitation	Chiguata	-16.4029	-71.3919	2969
[truncated: 21 more columns]
